# Supplementary material for: A social mechanism facilitates ant colony emigrations over different distances
Source: Oxford University Press journal article supplement (doi:10.1242/jeb.145276), 2016-01-01
Supplement: jeb145276supp.pdf [file jeb145276supp.pdf]

## **Supplementary Tables S1 and S2**

[Click here to Download Tables S1 & S2](#)
